# Supplementary material for: Alteration in Nasopharyngeal Microbiota Profile in Aged Patients with COVID-19
Source: MDPI journal article supplement (doi:10.3390/diagnostics11091622), 2021-09-05
Supplement: s1 [file s1]

**Supplementary Table S1. Detailed information of the samples used for the current study.**

| Sample ID                           | Age       | Sex    | Ethnicity        |
|-------------------------------------|-----------|--------|------------------|
| <b>Negative Asymptomatic (NegA)</b> |           |        |                  |
| NA-1.                               | 61 years  | Female | African American |
| NA-2.                               | 58 years  | Female | African American |
| NA-3.                               | 59 years  | Female | African American |
| NA-4.                               | 65 years  | Female | African American |
| NA-5.                               | 67 years  | Female | African American |
| NA-9.                               | 59 years  | Female | Caucasian        |
| NA-15.                              | 70 years  | Male   | African American |
| NA-16.                              | 69 years  | Male   | African American |
| NA-17.                              | 70 years  | Male   | African American |
| NA-18.                              | 65 years  | Male   | Caucasian        |
| NA-19.                              | 57 years  | Male   | Caucasian        |
| NA-20.                              | 59 years. | Male   | Caucasian        |
| NA-22.                              | 64 year   | Male   | Caucasian        |
| NA-24.                              | 58 years  | Female | African American |
| NA-25.                              | 73 years  | Female | Caucasian        |
| NA-26.                              | 64 years  | Female | Caucasian        |
| NA-27.                              | 60 years  | Female | Caucasian        |
| NA-29.                              | 51 years  | Female | Caucasian        |
| NA-30.                              | 55 years  | Female | Caucasian        |
| NA-31.                              | 58 years  | Male   | African American |
| NA-32.                              | 52 Year   | Male   | African American |
| NA-34.                              | 62 Year   | Male   | African American |
| NA-35.                              | 64 Year   | Male   | African American |
| NA-33.                              | 57 Year   | Male   | Caucasian        |
| NA-36.                              | 63 years  | Male   | Caucasian        |
| NA-37.                              | 68 years  | Male   | Caucasian        |
| NA-38.                              | 52 years  | Male   | Caucasian        |
| <b>Positive Asymptomatic (PA)</b>   |           |        |                  |
| PA-2                                | 75 years  | Female | African American |
| PA-3                                | 69 years  | Female | African American |
| PA-4                                | 61 years  | Female | African American |
| PA-5                                | 78 years  | Female | African American |
| PA-6                                | 69 years  | Female | African American |
| PA-8                                | 69 years  | Female | Caucasian        |
| PA-9                                | 59 years  | Female | Caucasian        |
| PA-10                               | 63 years  | Female | Caucasian        |
| PA-11                               | 61 years  | Female | Caucasian        |
| PA-12                               | 60 years  | Female | Caucasian        |
| PA-13                               | 62 years  | Female | Caucasian        |
| PA-14                               | 64 years  | Female | Caucasian        |
| PA-15                               | 60 years  | Male   | African American |
| PA-16                               | 72 years  | Male   | African American |
| PA-17                               | 64 years  | Male   | African American |
| PA-18                               | 59 years  | Male   | African American |
| PA-19                               | 60 years  | Male   | African American |
| PA-20                               | 63 years  | Male   | African American |
| PA-21                               | 55 years  | Male   | African American |

|                                   |          |        |                  |
|-----------------------------------|----------|--------|------------------|
| PA-22                             | 65 years | Male   | Caucasian        |
| PA-23                             | 72 years | Male   | Caucasian        |
| PA-25                             | 64 years | Male   | Caucasian        |
| PA-26                             | 50 years | Male   | Caucasian        |
| PA-27                             | 57 years | Male   | Caucasian        |
| PA-28                             | 53 years | Female | African American |
| PA-29                             | 67 years | Female | Caucasian        |
| PA-30                             | 73 years | Male   | African American |
| PA-31                             | 71 years | Male   | Caucasian        |
| PA-32                             | 62 years | Male   | Caucasian        |
| PA-33                             | 58 years | Male   | Caucasian        |
| <b>Positive Symptomatic (PSY)</b> |          |        |                  |
| PSY-1                             | 66 Year  | Female | Caucasian        |
| PSY-2                             | 57 Year  | Female | Caucasian        |
| PSY-3                             | 54 Year  | Female | Caucasian        |
| PSY-4                             | 51 year  | Female | Caucasian        |
| PSY-5                             | 76 year  | Female | Caucasian        |
| PSY-6                             | 59 year  | Female | Caucasian        |
| PSY-7                             | 48 year  | Female | African American |
| PSY-8                             | 63 year  | Female | African American |
| PSY-9                             | 55 year  | Female | African American |
| PSY-10                            | 62 year  | Female | African American |
| PSY-11                            | 57 year  | Female | African American |
| PSY-12                            | 51 year  | Male   | Caucasian        |
| PSY-13                            | 55 year  | Male   | Caucasian        |
| PSY-14                            | 48 year  | Male   | Caucasian        |
| PSY-16                            | 74 year  | Male   | African American |
| PSY-17                            | 50 year  | Male   | African American |
| PSY-20                            | 50 year  | Male   | African American |
| PSY-21                            | 49 Year  | Male   | African American |
| PSY-22                            | 47 Year  | Male   | African American |
| PSY-23                            | 61 Year  | Female | Caucasian        |
| PSY-24                            | 72 Year  | Female | African American |
| PSY-25                            | 51 year  | Female | African American |
| PSY-26                            | 56 Year  | Male   | Caucasian        |
| PSY-27                            | 69 Year  | Male   | Caucasian        |
| PSY-28                            | 54 Year  | Male   | Caucasian        |
| PSY-29                            | 51 Year  | Male   | Caucasian        |
| PSY-30                            | 72 year  | Male   | African American |
